# Supplementary material for: Colorectal Cancer Detection via Metabolites and Machine Learning
Source: MDPI journal article supplement (doi:10.3390/cimb46050254), 2024-04-30
Supplement: s1 [file s1]

# Colorectal Cancer Detection via Metabolites and Machine Learning

Rachel Yang , Igor F. Tsigelny, Santosh Kesari, Valentina L. Kouznetsova

## Supplementary Material 1

### Figures S1–S6

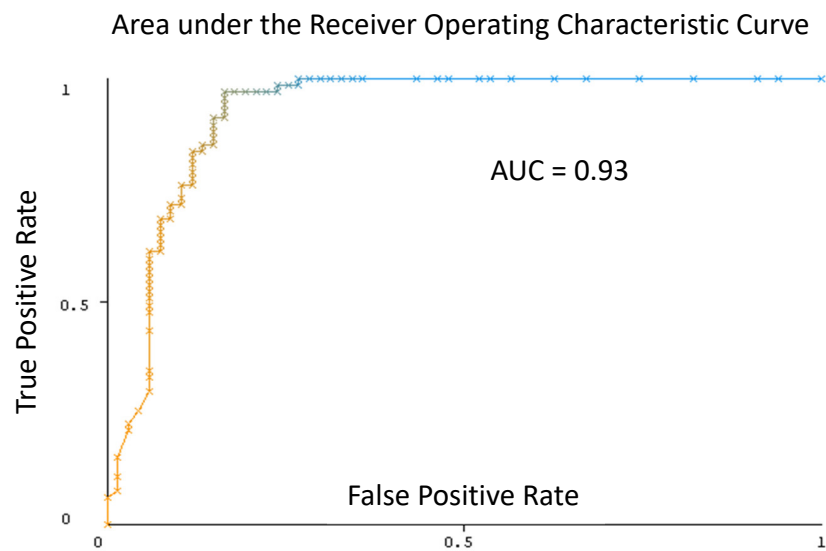

Figure S1. Stage 0–2 after InfoGain filtration, Bagging Classifier

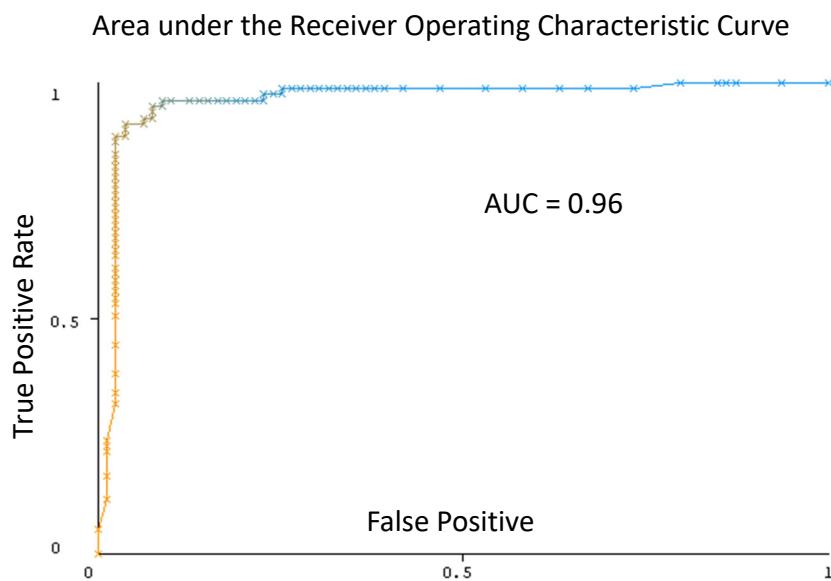

Figure S2. Stage 0–4 after InfoGain filtration,

Area under the Receiver Operating Characteristic Curve

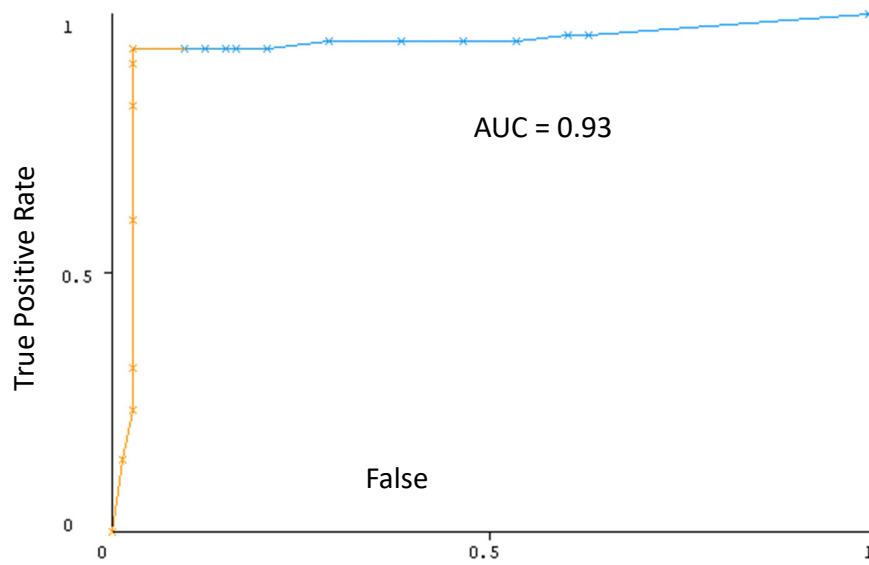

Figure S3. Stage 0–2 after InfoGain filtration,

Area under the Precision–Recall Curve

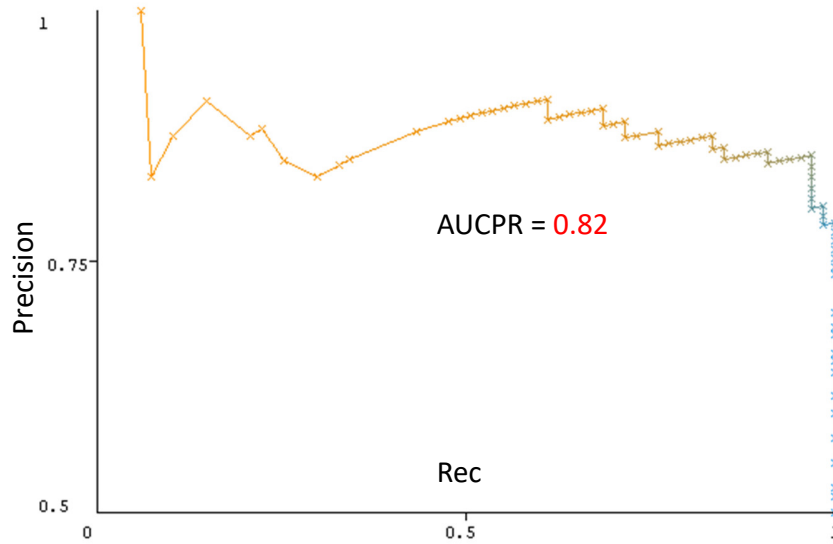

Figure S4. Stage 0–2 after InfoGain filtration,

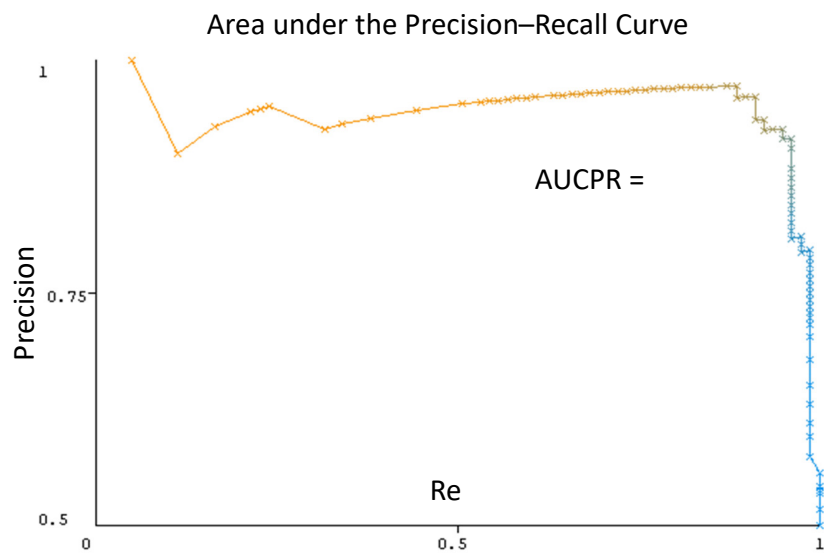

**Figure S5. Stage 0–4 after InfoGain filtration,**

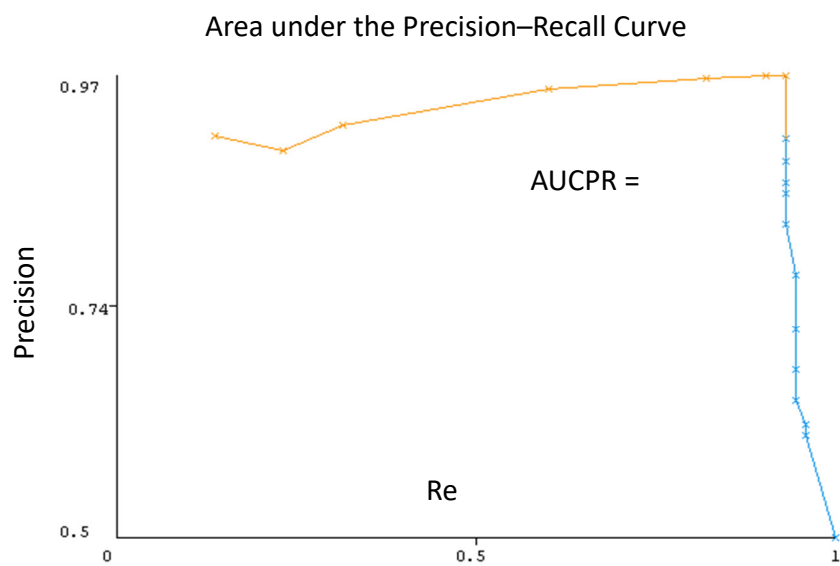

**Figure S6. Stage 3–4 after InfoGain filtration,**

# Colorectal Cancer Detection via Metabolites and Machine Learning

Rachel Yang , Igor F. Tsigelny, Santosh Kesari, Valentina L. Kouznetsova

## Supplementary Material 2

### Tables S1–S4

Table S1. Stage 0–2 Metabolites

| #  | Name               | Fold Change | SMILES (canonical)                                         |
|----|--------------------|-------------|------------------------------------------------------------|
| 1  | Pyruvate           | 1.53        | <chem>CC(=O)C(=O)[O-]</chem>                               |
| 2  | Oxalacetic acid    | 1.53        | <chem>C(C(=O)C(=O)O)C(=O)O</chem>                          |
| 3  | Lactic acid        | 0.74        | <chem>CC(C(=O)O)O</chem>                                   |
| 4  | 2-hydroxy-butyrate | 1.35        | <chem>CCC(C(=O)[O-])O</chem>                               |
| 5  | Oxalate            | 1.91        | <chem>C(=O)(C(=O)[O-])[O-]</chem>                          |
| 6  | Sarcosine          | 1.41        | <chem>CNCC(=O)O</chem>                                     |
| 7  | 3-hydroxy-butyrate | 1.54        | <chem>CC(CC(=O)[O-])O</chem>                               |
| 8  | Valine(2TMS)       | 1.09        | <chem>CC(C)C(C(=O)O[Si](C)(C)C)N[Si](C)(C)C</chem>         |
| 9  | Dihydroxyacetone   | 1.09        | <chem>C(C(=O)CO)O</chem>                                   |
| 10 | 2-aminoethanol     | 1.12        | <chem>C(CO)N</chem>                                        |
| 11 | n-caprylic acid    | 1.17        | <chem>CCCCCCCC(=O)O</chem>                                 |
| 12 | Isoleucine         | 1.26        | <chem>CCC(C)C(C(=O)O)N</chem>                              |
| 13 | Glycine(3TMS)      | 1.16        | <chem>C[Si](C)(C)N(CC(=O)O[Si](C)(C)C)[Si](C)(C)C</chem>   |
| 14 | Glyceric acid      | 1.31        | <chem>C(C(C(=O)O)O)O</chem>                                |
| 15 | Serine(3TMS)       | 1.32        | <chem>C[Si](C)(C)NC(CO[Si](C)(C)C)C(=O)O[Si](C)(C)C</chem> |
| 16 | Nonanoic acid(C9)  | 0.79        | <chem>CCCCCCCCC(=O)O</chem>                                |
| 17 | β-Alanine          | 1.33        | <chem>C(CN)C(=O)O</chem>                                   |
| 18 | Malic acid         | 1.28        | <chem>C(C(C(=O)O)O)C(=O)O</chem>                           |
| 19 | Threitol           | 1.38        | <chem>C(C(C(CO)O)O)O</chem>                                |

|    |                                |      |                                           |
|----|--------------------------------|------|-------------------------------------------|
| 20 | meso-erythritol                | 2.03 | <chem>C(C(C(CO)O)O)O</chem>               |
| 21 | Acetylsalicylic acid           | 0.64 | <chem>CC(=O)OC1=CC=CC=C1C(=O)O</chem>     |
| 22 | Aspartic acid                  | 1.47 | <chem>C(C(C(=O)O)N)C(=O)O</chem>          |
| 23 | Pyroglutamic acid              | 1.44 | <chem>C1CC(=O)NC1C(=O)O</chem>            |
| 24 | Creatinine                     | 0.85 | <chem>CN1CC(=O)N=C1N</chem>               |
| 25 | Glutamic acid                  | 1.57 | <chem>C(CC(=O)O)C(C(=O)O)N</chem>         |
| 26 | Phenylalanine                  | 1.26 | <chem>C1=CC=C(C=C1)CC(C(=O)O)N</chem>     |
| 27 | p-hydroxybenzoic acid          | 1.65 | <chem>C1=CC(=CC=C1C(=O)O)O</chem>         |
| 28 | Threo-β-hydroxyaspartic acid   | 1.45 | <chem>C(C(C(=O)O)O)(C(=O)O)N</chem>       |
| 29 | Arabinose                      | 1.48 | <chem>C1C(C(C(C(O1)O)O)O)O</chem>         |
| 30 | Lauric acid                    | 1.33 | <chem>CCCCCCCCCCCCC(=O)O</chem>           |
| 31 | Ribulose                       | 0.66 | <chem>C(C(C(C(=O)CO)O)O)O</chem>          |
| 32 | Ribose                         | 0.66 | <chem>C(C(C(C(=O)O)O)O)O</chem>           |
| 33 | Taurine                        | 4.63 | <chem>C(CS(=O)(=O)O)N</chem>              |
| 34 | Xylitol                        | 1.28 | <chem>C(C(C(C(CO)O)O)O)O</chem>           |
| 35 | Arabitol                       | 1.31 | <chem>C(C(C(C(CO)O)O)O)O</chem>           |
| 36 | Ribitol                        | 1.35 | <chem>C(C(C(C(CO)O)O)O)O</chem>           |
| 37 | Putrescine                     | 0.72 | <chem>C(CCN)CN</chem>                     |
| 38 | Aconitate                      | 1.20 | <chem>C(C(=CC(=O)O)C(=O)O)C(=O)O</chem>   |
| 39 | 4-hydroxymandelate             | 0.91 | <chem>C1=CC(=CC=C1C(C(=O)O)O)O</chem>     |
| 40 | Methoxy-4-hydroxyphenylacetate | 0.80 | <chem>COC1=C(C=CC(=C1)CC(=O)O)O</chem>    |
| 41 | O-phosphoethanolamine          | 0.92 | <chem>C(COP(=O)(O)O)N</chem>              |
| 42 | Citric acid                    | 1.28 | <chem>C(C(=O)O)C(CC(=O)O)(C(=O)O)O</chem> |
| 43 | Isocitric acid                 | 1.28 | <chem>C(C(C(C(=O)O)O)C(=O)O)C(=O)O</chem> |
| 44 | Ornithine                      | 1.36 | <chem>C(CC(C(=O)O)N)CN</chem>             |

|    |                                              |      |                                               |
|----|----------------------------------------------|------|-----------------------------------------------|
| 45 | Tagatose_2(or<br>Psicose_2)                  | 1.57 | <chem>C(C(C(C(C(=O)CO)O)O)O)O</chem>          |
| 46 | $\alpha$ -sorbopyranose_1<br>(or Fructose_1) | 1.13 | <chem>C1C(C(C(C(O1)(CO)O)O)O)O</chem>         |
| 47 | Mannose_1                                    | 1.26 | <chem>C(C(C(C(C(=O)O)O)O)O)O</chem>           |
| 48 | 5-dehydroquinic acid                         | 1.23 | <chem>C1C(C(C(=O)CC1(C(=O)O)O)O)O</chem>      |
| 49 | Glucose_1                                    | 0.73 | <chem>C(C1C(C(C(C(O1)O)O)O)O)O</chem>         |
| 50 | Gulcono-1,4-lactone                          | 1.88 | <chem>C(C(C1C(C(C(=O)O1)O)O)O)O</chem>        |
| 51 | Galactosamine_1                              | 1.59 | <chem>CC(=O)NC1C(C(C(OC1O)CO)O)O</chem>       |
| 52 | Glucuronate_1                                | 1.34 | <chem>C(=O)C(C(C(C(C(=O)O)O)O)O)O</chem>      |
| 53 | Glucosamine_2                                | 1.28 | <chem>C(C1C(C(C(C(O1)O)N)O)O)O</chem>         |
| 54 | Tyrosine                                     | 1.27 | <chem>C1=CC(=CC=C1CC(C(=O)O)N)O</chem>        |
| 55 | Gallic acid                                  | 0.81 | <chem>C1=C(C=C(C(=C1O)O)O)C(=O)O</chem>       |
| 56 | 1-hexadecanol                                | 1.15 | <chem>CCCCCCCCCCCCCCCCCO</chem>               |
| 57 | S-benzyl-L-<br>Cysteine_1                    | 1.02 | <chem>C1=CC=C(C=C1)CSCC(C(=O)O)N</chem>       |
| 58 | Palmitoleate                                 | 1.44 | <chem>CCCCCCC=CCCCCCCCC(=O)[O-]</chem>        |
| 59 | Dopamine                                     | 1.96 | <chem>C1=CC(=C(C=C1CCN)O)O</chem>             |
| 60 | Inositol                                     | 1.20 | <chem>C1(C(C(C(C(C1O)O)O)O)O)O</chem>         |
| 61 | Heptadecanoate                               | 1.30 | <chem>CCCCCCCCCCCCCCCCC(=O)[O-]</chem>        |
| 62 | Kynurenine                                   | 1.72 | <chem>C1=CC=C(C(=C1)C(=O)CC(C(=O)O)N)N</chem> |
| 63 | Cystamine                                    | 1.43 | <chem>C(CSSCCN)N</chem>                       |
| 64 | Elaidic acid                                 | 1.13 | <chem>CCCCCCCCC=CCCCCCCCC(=O)O</chem>         |
| 65 | Cysteine                                     | 1.72 | <chem>C(C(C(=O)O)N)S</chem>                   |
| 66 | Cystine                                      | 1.72 | <chem>C(C(C(=O)O)N)SSCC(C(=O)O)N</chem>       |
| 67 | 2'-deoxyuridine_2                            | 1.37 | <chem>C1C(C(OC1N2C=CC(=O)NC2=O)CO)O</chem>    |

REFERENCE: Table compiled from Nishiumi, S.; Kobayashi, T.; Ikeda, A.; Yoshie, T.; Kibi, M.; Izumi, Y.; Okuno, T.; Hayashi, N.; Kawano, S.; Takenawa, T.; et al. A novel serum metabolomics-based diagnostic approach for colorectal cancer. *PLoS ONE*. **2012**, 7, e40459. <https://doi.org/10.1371/journal.pone.0040459>.

**Table S2. Stage 3–4 Metabolites**

| #  | Name                      | Fold Change | SMILES (canonical)                                         |
|----|---------------------------|-------------|------------------------------------------------------------|
| 1  | Pyruvate                  | 1.53        | <chem>CC(=O)C(=O)[O-]</chem>                               |
| 2  | Oxalacetic acid           | 1.53        | <chem>C(C(=O)C(=O)O)C(=O)O</chem>                          |
| 3  | Lactic acid               | 0.83        | <chem>CC(C(=O)O)O</chem>                                   |
| 4  | Glycolic acid             | 1.22        | <chem>C(C(=O)O)O</chem>                                    |
| 5  | 2-hydroxy-butyrate        | 1.51        | <chem>CCC(C(=O)[O-])O</chem>                               |
| 6  | Oxalate                   | 1.45        | <chem>C(=O)(C(=O)[O-])[O-]</chem>                          |
| 7  | Sarcosine                 | 1.69        | <chem>CNCC(=O)O</chem>                                     |
| 8  | Ketoisoleucine_1          | 1.25        | <chem>CCC(C)C(=O)C(=O)O</chem>                             |
| 9  | Valine(2TMS)              | 1.14        | <chem>CC(C)C(C(=O)O[Si](C)(C)C)N[Si](C)(C)C</chem>         |
| 10 | Dihydroxyacetone          | 1.39        | <chem>C(C(=O)CO)O</chem>                                   |
| 11 | 2-aminoethanol            | 1.15        | <chem>C(CO)N</chem>                                        |
| 12 | Phosphate                 | 1.27        | <chem>[O-]P(=O)([O-])[O-]</chem>                           |
| 13 | Leucine                   | 1.23        | <chem>CC(C)CC(C(=O)O)N</chem>                              |
| 14 | Isoleucine                | 1.46        | <chem>CCC(C)C(C(=O)O)N</chem>                              |
| 15 | Proline                   | 1.33        | <chem>C1CC(NC1)C(=O)O</chem>                               |
| 16 | Glycine(3TMS)             | 1.15        | <chem>C[Si](C)(C)N(CC(=O)O[Si](C)(C)C)[Si](C)(C)C</chem>   |
| 17 | Glyceric acid             | 1.29        | <chem>C(C(C(=O)O)O)O</chem>                                |
| 18 | Serine(3TMS)              | 1.42        | <chem>C[Si](C)(C)NC(CO[Si](C)(C)C)C(=O)O[Si](C)(C)C</chem> |
| 19 | Nonanoic acid(C9)         | 0.77        | <chem>CCCCCCCCC(=O)O</chem>                                |
| 20 | β-Alanine                 | 1.26        | <chem>C(CN)C(=O)O</chem>                                   |
| 21 | Malic acid                | 1.47        | <chem>C(C(C(=O)O)O)C(=O)O</chem>                           |
| 22 | Threitol                  | 1.32        | <chem>C(C(C(CO)O)O)O</chem>                                |
| 23 | meso-erythritol           | 1.99        | <chem>C(C(C(CO)O)O)O</chem>                                |
| 24 | Aspartic acid             | 1.93        | <chem>C(C(C(=O)O)N)C(=O)O</chem>                           |
| 25 | trans-4-hydroxy-L-proline | 1.32        | <chem>C1C(CNC1C(=O)O)O</chem>                              |
| 26 | Pyroglutamic acid         | 1.25        | <chem>C1CC(=O)NC1C(=O)O</chem>                             |
| 27 | β-Glutamic acid           | 1.19        | <chem>C(C(CC(=O)O)N)C(=O)O</chem>                          |
| 28 | Glutamic acid             | 2.38        | <chem>C(CC(=O)O)C(C(=O)O)N</chem>                          |

|    |                                   |      |                                           |
|----|-----------------------------------|------|-------------------------------------------|
| 29 | Phenylalanine                     | 1.59 | <chem>C1=CC=C(C=C1)CC(C(=O)O)N</chem>     |
| 30 | p-hydroxybenzoic acid             | 1.53 | <chem>C1=CC(=CC=C1C(=O)O)O</chem>         |
| 31 | Xylose_2                          | 1.15 | <chem>C(C(C(C(C=O)O)O)O)O</chem>          |
| 32 | Lyxose_2                          | 1.52 | <chem>C(C(C(C(C=O)O)O)O)O</chem>          |
| 33 | Threo-β-hydroxyaspartic acid      | 1.55 | <chem>C(C(C(=O)O)O)(C(=O)O)N</chem>       |
| 34 | Arabinose                         | 1.56 | <chem>C1C(C(C(C(O1)O)O)O)O</chem>         |
| 35 | Lauric acid                       | 1.15 | <chem>CCCCCCCCCCCC(=O)O</chem>            |
| 36 | Ribose                            | 0.76 | <chem>C(C(C(C(C=O)O)O)O)O</chem>          |
| 37 | Asparagine                        | 1.23 | <chem>C(C(C(=O)O)N)C(=O)N</chem>          |
| 38 | Xylitol                           | 1.46 | <chem>C(C(C(C(CO)O)O)O)O</chem>           |
| 39 | 1,6-anhydroglucose                | 0.96 | <chem>C1C2C(C(C(C(O1)O2)O)O)O</chem>      |
| 40 | Arabitol                          | 1.39 | <chem>C(C(C(C(CO)O)O)O)O</chem>           |
| 41 | Ribitol                           | 1.49 | <chem>C(C(C(C(CO)O)O)O)O</chem>           |
| 42 | Aconitate                         | 1.21 | <chem>C(C(=CC(=O)O)C(=O)O)C(=O)O</chem>   |
| 43 | Methoxy-4-hydroxyphenylacetate    | 0.99 | <chem>COC1=C(C=CC(=C1)CC(=O)O)O</chem>    |
| 44 | Glycyl-Glycine_1                  | 1.22 | <chem>C(C(=O)NCC(=O)O)N</chem>            |
| 45 | Citric acid                       | 1.28 | <chem>C(C(=O)O)C(CC(=O)O)(C(=O)O)O</chem> |
| 46 | Isocitric acid                    | 1.28 | <chem>C(C(C(C(=O)O)O)C(=O)O)C(=O)O</chem> |
| 47 | Ornithine                         | 1.37 | <chem>C(CC(C(=O)O)N)CN</chem>             |
| 48 | Citrulline                        | 1.29 | <chem>C(CC(C(=O)O)N)CNC(=O)N</chem>       |
| 49 | 1,5-anhydro-D-glucitol            | 0.67 | <chem>C1C(C(C(C(O1)CO)O)O)O</chem>        |
| 50 | Tagatose_2(or Psicose_2)          | 1.82 | <chem>C(C(C(C(C(=O)CO)O)O)O)O</chem>      |
| 51 | α-sorbopyranose_1 (or Fructose_1) | 2.10 | <chem>C1C(C(C(C(O1)(CO)O)O)O)O</chem>     |
| 52 | Mannose_1                         | 1.83 | <chem>C(C(C(C(C(C=O)O)O)O)O)O</chem>      |
| 53 | 5-dehydroquinic acid              | 1.77 | <chem>C1C(C(C(=O)CC1(C(=O)O)O)O)O</chem>  |
| 54 | Glucose_1                         | 0.93 | <chem>C(C1C(C(C(C(O1)O)O)O)O)O</chem>     |

|    |                                   |      |                                                                            |
|----|-----------------------------------|------|----------------------------------------------------------------------------|
| 55 | Lysine(4TMS)                      | 0.89 | <chem>C[Si](C)(C)NC(CCCCN([Si](C)(C)C)[Si](C)(C)C)C(=O)O[Si](C)(C)C</chem> |
| 56 | Galactosamine_1                   | 1.54 | <chem>CC(=O)NC1C(C(C(OC1O)CO)O)O</chem>                                    |
| 57 | Glucuronate_1                     | 1.34 | <chem>C(=O)C(C(C(C(C(=O)O)O)O)O)O</chem>                                   |
| 58 | Glucosamine_2                     | 1.28 | <chem>C(C1C(C(C(C(O1)O)N)O)O)O</chem>                                      |
| 59 | Tyrosine                          | 1.22 | <chem>C1=CC(=CC=C1CC(C(=O)O)N)O</chem>                                     |
| 60 | 1-hexadecanol                     | 1.21 | <chem>CCCCCCCCCCCCCCCCCO</chem>                                            |
| 61 | N- $\alpha$ -acetyl-L-Ornithine_2 | 1.41 | <chem>CC(=O)NC(CCN)CC(=O)O</chem>                                          |
| 62 | S-benzyl-L-Cysteine_1             | 1.41 | <chem>C1=CC=C(C=C1)CSCC(C(=O)O)N</chem>                                    |
| 63 | Dopamine                          | 1.99 | <chem>C1=CC(=C(C=C1CCN)O)O</chem>                                          |
| 64 | Inositol                          | 1.17 | <chem>C1(C(C(C(C(C1O)O)O)O)O)O</chem>                                      |
| 65 | N- $\alpha$ -acetyl-L-Lysine_2    | 2.08 | <chem>CC(=O)NC(CCCCN)C(=O)O</chem>                                         |
| 66 | Heptadecanoate                    | 1.37 | <chem>CCCCCCCCCCCCCCCCC(=O)[O-]</chem>                                     |
| 67 | Kynurenine                        | 1.98 | <chem>C1=CC=C(C(=C1)C(=O)CC(C(=O)O)N)N</chem>                              |
| 68 | Cystamine                         | 1.24 | <chem>C(CSSCCN)N</chem>                                                    |
| 69 | Tryptophan                        | 0.97 | <chem>C1=CC=C2C(=C1)C(=CN2)CC(C(=O)O)N</chem>                              |
| 70 | Cysteine                          | 1.72 | <chem>C(C(C(=O)O)N)S</chem>                                                |
| 71 | Cystine                           | 1.72 | <chem>C(C(C(=O)O)N)SSCC(C(=O)O)N</chem>                                    |
| 72 | 2'-deoxyuridine_2                 | 1.71 | <chem>C1C(C(OC1N2C=CC(=O)NC2=O)CO)O</chem>                                 |
| 73 | Lactitol                          | 8.19 | <chem>C(C1C(C(C(C(O1)OC(C(CO)O)C(C(CO)O)O)O)O)O)O</chem>                   |

REFERENCE: Table compiled from Nishiumi, S.; Kobayashi, T.; Ikeda, A.; Yoshie, T.; Kibi, M.; Izumi, Y.; Okuno, T.; Hayashi, N.; Kawano, S.; Takenawa, T.; et al. A novel serum metabolomics-based diagnostic approach for colorectal cancer. *PLoS ONE*. **2012**, 7, e40459. <https://doi.org/10.1371/journal.pone.0040459>.

**Table S3. Stage 0–4 Metabolites**

| # | Name            | Fold Change | SMILES (canonical)                |
|---|-----------------|-------------|-----------------------------------|
| 1 | Pyruvate        | 1.53        | <chem>CC(=O)C(=O)[O-]</chem>      |
| 2 | Oxalacetic acid | 1.53        | <chem>C(C(=O)C(=O)O)C(=O)O</chem> |
| 3 | Lactic acid     | 0.78        | <chem>CC(C(=O)O)O</chem>          |
| 4 | Glycolic acid   | 1.13        | <chem>C(C(=O)O)O</chem>           |

|    |                           |      |                                                            |
|----|---------------------------|------|------------------------------------------------------------|
| 5  | 2-hydroxy-butyrate        | 1.42 | <chem>CCC(C(=O)[O-])O</chem>                               |
| 6  | Oxalate                   | 1.70 | <chem>C(=O)(C(=O)[O-])[O-]</chem>                          |
| 7  | Sarcosine                 | 1.54 | <chem>CNCC(=O)O</chem>                                     |
| 8  | 3-hydroxy-butyrate        | 1.88 | <chem>CC(CC(=O)[O-])O</chem>                               |
| 9  | Ketoisoleucine_1          | 1.17 | <chem>CCC(C)C(=O)C(=O)O</chem>                             |
| 10 | Valine(2TMS)              | 1.11 | <chem>CC(C)C(C(=O)O[Si](C)(C)C)N[Si](C)(C)C</chem>         |
| 11 | Dihydroxyacetone          | 1.23 | <chem>C(C(=O)CO)O</chem>                                   |
| 12 | 2-aminoethanol            | 1.13 | <chem>C(CO)N</chem>                                        |
| 13 | n-caprylic acid           | 1.13 | <chem>CCCCCCCC(=O)O</chem>                                 |
| 14 | Phosphate                 | 1.16 | <chem>[O-]P(=O)([O-])[O-]</chem>                           |
| 15 | Leucine                   | 1.16 | <chem>CC(C)CC(C(=O)O)N</chem>                              |
| 16 | Isoleucine                | 1.35 | <chem>CCC(C)C(C(=O)O)N</chem>                              |
| 17 | Proline                   | 1.23 | <chem>C1CC(NC1)C(=O)O</chem>                               |
| 18 | Glycine(3TMS)             | 1.16 | <chem>C[Si](C)(C)N(CC(=O)O[Si](C)(C)C)[Si](C)(C)C</chem>   |
| 19 | Glyceric acid             | 1.30 | <chem>C(C(C(=O)O)O)O</chem>                                |
| 20 | Serine(3TMS)              | 1.36 | <chem>C[Si](C)(C)NC(CO[Si](C)(C)C)C(=O)O[Si](C)(C)C</chem> |
| 21 | Nonanoic acid(C9)         | 0.78 | <chem>CCCCCCCCC(=O)O</chem>                                |
| 22 | β-Alanine                 | 1.30 | <chem>C(CN)C(=O)O</chem>                                   |
| 23 | Malic acid                | 1.37 | <chem>C(C(C(=O)O)O)C(=O)O</chem>                           |
| 24 | Threitol                  | 1.35 | <chem>C(C(C(CO)O)O)O</chem>                                |
| 25 | meso-erythritol           | 2.01 | <chem>C(C(C(CO)O)O)O</chem>                                |
| 26 | Aspartic acid             | 1.68 | <chem>C(C(C(=O)O)N)C(=O)O</chem>                           |
| 27 | trans-4-hydroxy-L-proline | 1.15 | <chem>C1C(CNC1C(=O)O)O</chem>                              |
| 28 | Pyroglutamic acid         | 1.35 | <chem>C1CC(=O)NC1C(=O)O</chem>                             |
| 29 | Creatinine                | 0.90 | <chem>CN1CC(=O)N=C1N</chem>                                |
| 30 | β-Glutamic acid           | 1.13 | <chem>C(C(CC(=O)O)N)C(=O)O</chem>                          |
| 31 | Glutamic acid             | 1.94 | <chem>C(CC(=O)O)C(C(=O)O)N</chem>                          |
| 32 | Phenylalanine             | 1.41 | <chem>C1=CC=C(C=C1)CC(C(=O)O)N</chem>                      |
| 33 | p-hydroxybenzoic acid     | 1.60 | <chem>C1=CC(=CC=C1C(=O)O)O</chem>                          |
| 34 | Xylose_2                  | 1.33 | <chem>C(C(C(C(C(=O)O)O)O)O)O</chem>                        |

|    |                                           |      |                                           |
|----|-------------------------------------------|------|-------------------------------------------|
| 35 | Threo- $\beta$ -hydroxyaspartic acid      | 1.50 | <chem>C(C(C(=O)O)O)(C(=O)O)N</chem>       |
| 36 | Arabinose                                 | 1.52 | <chem>C1C(C(C(C(O1)O)O)O)O</chem>         |
| 37 | Lauric acid                               | 1.25 | <chem>CCCCCCCCCCCC(=O)O</chem>            |
| 38 | Ribulose                                  | 0.71 | <chem>C(C(C(C(=O)CO)O)O)O</chem>          |
| 39 | Ribose                                    | 0.71 | <chem>C(C(C(C(=O)O)O)O)O</chem>           |
| 40 | Asparagine                                | 1.17 | <chem>C(C(C(=O)O)N)C(=O)N</chem>          |
| 41 | Taurine                                   | 3.43 | <chem>C(CS(=O))(=O)O)N</chem>             |
| 42 | Xylitol                                   | 1.36 | <chem>C(C(C(C(CO)O)O)O)O</chem>           |
| 43 | Arabitol                                  | 1.35 | <chem>C(C(C(C(CO)O)O)O)O</chem>           |
| 44 | Ribitol                                   | 1.42 | <chem>C(C(C(C(CO)O)O)O)O</chem>           |
| 45 | Putrescine                                | 0.87 | <chem>C(CCN)CN</chem>                     |
| 46 | Aconitate                                 | 1.20 | <chem>C(C(=CC(=O)O)C(=O)O)C(=O)O</chem>   |
| 47 | Methoxy-4-hydroxyphenylacetate            | 0.89 | <chem>COC1=C(C=CC(=C1)CC(=O)O)O</chem>    |
| 48 | O-phosphoethanolamine                     | 0.95 | <chem>C(COP(=O)(O)O)N</chem>              |
| 49 | Citric acid                               | 1.28 | <chem>C(C(=O)O)C(CC(=O)O)(C(=O)O)O</chem> |
| 50 | Isocitric acid                            | 1.28 | <chem>C(C(C(C(=O)O)O)C(=O)O)C(=O)O</chem> |
| 51 | Ornithine                                 | 1.37 | <chem>C(CC(C(=O)O)N)CN</chem>             |
| 52 | Citrulline                                | 1.18 | <chem>C(CC(C(=O)O)N)CNC(=O)N</chem>       |
| 53 | 1,5-anhydro-D-glucitol                    | 0.87 | <chem>C1C(C(C(C(O1)CO)O)O)O</chem>        |
| 54 | Tagatose_2(or Psicose_2)                  | 1.68 | <chem>C(C(C(C(C(=O)CO)O)O)O)O</chem>      |
| 55 | $\alpha$ -sorbopyranose_1 (or Fructose_1) | 1.57 | <chem>C1C(C(C(C(O1)(CO)O)O)O)O</chem>     |
| 56 | Mannose_1                                 | 1.52 | <chem>C(C(C(C(C(=O)O)O)O)O)O</chem>       |
| 57 | 5-dehydroquinic acid                      | 1.47 | <chem>C1C(C(C(=O)CC1(C(=O)O)O)O)O</chem>  |
| 58 | Glucose_1                                 | 0.82 | <chem>C(C1C(C(C(C(O1)O)O)O)O)O</chem>     |
| 59 | Gulcono-1,4-lactone                       | 2.04 | <chem>C(C(C1C(C(C(=O)O1)O)O)O)O</chem>    |
| 60 | Galactosamine_1                           | 1.57 | <chem>CC(=O)NC1C(C(C(OC1O)CO)O)O</chem>   |

|    |                                   |      |                                                          |
|----|-----------------------------------|------|----------------------------------------------------------|
| 61 | Glucuronate_1                     | 1.34 | <chem>C(=O)C(C(C(C(C(=O)O)O)O)O)O</chem>                 |
| 62 | Glucosamine_2                     | 1.28 | <chem>C(C1C(C(C(C(O1)O)N)O)O)O</chem>                    |
| 63 | Tyrosine                          | 1.25 | <chem>C1=CC(=CC=C1CC(C(=O)O)N)O</chem>                   |
| 64 | Gallic acid                       | 0.90 | <chem>C1=C(C=C(C(=C1O)O)O)C(=O)O</chem>                  |
| 65 | 1-hexadecanol                     | 1.18 | <chem>CCCCCCCCCCCCCCCCCO</chem>                          |
| 66 | N- $\alpha$ -acetyl-L-Ornithine_2 | 1.30 | <chem>CC(=O)NC(CCN)CC(=O)O</chem>                        |
| 67 | S-benzyl-L-Cysteine_1             | 1.19 | <chem>C1=CC=C(C=C1)CSCC(C(=O)O)N</chem>                  |
| 68 | Palmitoleate                      | 1.35 | <chem>CCCCCCC=CCCCCCCCC(=O)[O-]</chem>                   |
| 69 | Dopamine                          | 1.97 | <chem>C1=CC(=C(C=C1CCN)O)O</chem>                        |
| 70 | Inositol                          | 1.19 | <chem>C1(C(C(C(C(C1O)O)O)O)O)O</chem>                    |
| 71 | N- $\alpha$ -acetyl-L-Lysine_2    | 1.68 | <chem>CC(=O)NC(CCCCN)C(=O)O</chem>                       |
| 72 | Heptadecanoate                    | 1.33 | <chem>CCCCCCCCCCCCCCCCC(=O)[O-]</chem>                   |
| 73 | Kynurenine                        | 1.83 | <chem>C1=CC=C(C(=C1)C(=O)CC(C(=O)O)N)N</chem>            |
| 74 | Cystamine                         | 1.34 | <chem>C(CSSCCN)N</chem>                                  |
| 75 | Elaidic acid                      | 1.14 | <chem>CCCCCCCCC=CCCCCCCCC(=O)O</chem>                    |
| 76 | Cysteine                          | 1.72 | <chem>C(C(C(=O)O)N)S</chem>                              |
| 77 | Cystine                           | 1.72 | <chem>C(C(C(=O)O)N)SSCC(C(=O)O)N</chem>                  |
| 78 | 2'-deoxyuridine_2                 | 1.52 | <chem>C1C(C(OC1N2C=CC(=O)NC2=O)CO)O</chem>               |
| 79 | Lactitol                          | 4.35 | <chem>C(C1C(C(C(C(O1)OC(C(CO)O)C(C(CO)O)O)O)O)O)O</chem> |

**REFERENCE:** Table compiled from Nishiumi, S.; Kobayashi, T.; Ikeda, A.; Yoshie, T.; Kibi, M.; Izumi, Y.; Okuno, T.; Hayashi, N.; Kawano, S.; Takenawa, T.; et al. A novel serum metabolomics-based diagnostic approach for colorectal cancer. *PLoS ONE*. **2012**, 7, e40459. <https://doi.org/10.1371/journal.pone.0040459>

**Table S4. Selected Machine-Learning Classifier Descriptions**

|                                                                                                                                                                                                                                                                                                                                                                                                                                                                                                                                                                                                                                                                                                                                                                                                                                                                                                                                                                                                                                                                                                                                                                                                                                                                                                                                                                                                                                                                                                                                                                                                                                         |
|-----------------------------------------------------------------------------------------------------------------------------------------------------------------------------------------------------------------------------------------------------------------------------------------------------------------------------------------------------------------------------------------------------------------------------------------------------------------------------------------------------------------------------------------------------------------------------------------------------------------------------------------------------------------------------------------------------------------------------------------------------------------------------------------------------------------------------------------------------------------------------------------------------------------------------------------------------------------------------------------------------------------------------------------------------------------------------------------------------------------------------------------------------------------------------------------------------------------------------------------------------------------------------------------------------------------------------------------------------------------------------------------------------------------------------------------------------------------------------------------------------------------------------------------------------------------------------------------------------------------------------------------|
| <p><b>Bagging</b> – an ensemble learning method that divides training dataset into subsets and selects with replacement; used to reduced variance.</p> <p><b>Random Forest</b> – an ensemble learning method using multiple decision trees to reduce overfitting and variance.</p> <p><b>REPTree</b> (Reduced Error Pruning Tree) – a decision tree learning method to split and diminish error in criterion.</p> <p><b>LWL</b> (Locally Weighted Learning) – an algorithm that assigns instance weights to perform classification or regression.</p> <p><b>LMT</b> (Logistic Model Trees) – an algorithm that uses classification trees along with logistic regression functions at its leaves.</p> <p><b>AttributeSelectedClassifier</b> – a classification algorithm that identifies a best-splitting criterion to separate the data in the training set into separate classes to evaluate.</p> <p><b>JRip</b> – an incremental reduced-error pruning algorithm; uses rule-based classification to classify elements of the training set.</p> <p><b>J48</b> – a classification algorithm using decision trees to choose the best attribute to partition the data training set.</p> <p><b>PART</b> (Partial C4.5) – a rule-based classifier that uses a decision tree to create rules from leaves and iterate through to evaluate given data.</p> <p><b>Simple Logistic</b> – a regression algorithm that predicts one binary variable based on one other variable to produce a numerical evaluation.</p> <p><b>Logit Boost</b> – an algorithm that performs additive logistic regression to evaluate data with multiple classes.</p> |
|-----------------------------------------------------------------------------------------------------------------------------------------------------------------------------------------------------------------------------------------------------------------------------------------------------------------------------------------------------------------------------------------------------------------------------------------------------------------------------------------------------------------------------------------------------------------------------------------------------------------------------------------------------------------------------------------------------------------------------------------------------------------------------------------------------------------------------------------------------------------------------------------------------------------------------------------------------------------------------------------------------------------------------------------------------------------------------------------------------------------------------------------------------------------------------------------------------------------------------------------------------------------------------------------------------------------------------------------------------------------------------------------------------------------------------------------------------------------------------------------------------------------------------------------------------------------------------------------------------------------------------------------|
